# Supplementary material
Source: publisher site journal article supplement (https://www.dovepress.com/article/419203)
Supplement: Supplementary file 1 [file get_supplementary_file.php]

## Appendix 1

### Code Book with Themes

| Leadership Behaviors Desired | Theme                     | Codes                               | Quotation from text                                                                                      |
|------------------------------|---------------------------|-------------------------------------|----------------------------------------------------------------------------------------------------------|
|                              | <b>Relational Support</b> | Feeling heard                       | I think people need to feel heard (10)                                                                   |
|                              |                           | Support                             | Yeah, to implement and to provide the support (1)                                                        |
|                              |                           | Collegiality                        | To just be sitting and laughing and smiling (9)                                                          |
|                              |                           | Peer Support                        | It's like how do we give good feedback (6)                                                               |
|                              |                           | Engage Stakeholders                 | They do at least engage in conversations (3)                                                             |
|                              |                           | Appreciation                        | Yeah, I think certainly lack of appreciation and positive reinforcements (8)                             |
|                              |                           | Recognition for hard work           | You can change your job title (9)                                                                        |
|                              |                           | Communicate for Value alignment     | You know balance the need for academics and need for cash (2)                                            |
|                              |                           | Constructive Feedback               | You know sort of like removing negative feedback (6)                                                     |
|                              |                           | Safe environment to bring up issues | If they know there is a safe place to talk (9)                                                           |
|                              | <b>Resources</b>          | Resource support                    | To have dedicated time that I can take to deal with whatever (4)                                         |
|                              |                           | Monetary compensation               | I would say figure out a way to compensate those of us in primary care (3)                               |
|                              |                           | Workplace efficiency                | If you know management operational efficiency (1)                                                        |
|                              |                           | Work life Balance                   | Not feeling like I have the right work-life balance (4)                                                  |
|                              | <b>Other</b>              | Unify efforts/Teamwork              | We talk about... things should be in teams... , but to get to this point it really hasn't been right (6) |
|                              |                           | Take ownership                      | And I feel like whatever solutions to come about. they sort of just kind of get landed on us (10)        |

| Leadership Behaviors Observed | Theme                              | Codes                                      | Quotation from text                                                                                                 |
|-------------------------------|------------------------------------|--------------------------------------------|---------------------------------------------------------------------------------------------------------------------|
|                               | <b>Communicate more frequently</b> | More events                                | You know social events and things like that, to try and build morale (2)                                            |
|                               |                                    | Check ins by leaders                       | And then the hospital leadership they created regular check ins (5)                                                 |
|                               |                                    | Free meals and food                        | Come to doctor doctors' day and get a free breakfast some ways I guess kind of I guess a free breakfast is nice (4) |
|                               |                                    | Collegiality                               | And I think also words of affirmation they knew to appreciate verbally periodically (5)                             |
|                               |                                    | Regular Meetings                           | I mean it was of course like town Halls forums, you know, very controlled what they will they'll show slides (3)    |
|                               | <b>Wellness Programs</b>           | Wellness tips                              | You know, like wellness tips and you know, also some, you know, talks (1)                                           |
|                               |                                    | Psychology referrals                       | Listen, you can talk for half an hour to the psychology department (9)                                              |
|                               |                                    | Resiliency                                 | The school does offer ... football games... use of the school gym... yoga classes (2)                               |
|                               |                                    | Home support                               | A work environment that stresses health at work and health at home (4)                                              |
|                               | <b>Agency</b>                      | Nothing happening lack of motivation       | I think this lack of transparency is intentional (10)                                                               |
|                               |                                    | Nothing Happening culture                  | Hey, I went through it, they will go stronger from it (6)                                                           |
|                               |                                    | Take it to leadership, but nothing happens | Ok we need to get 40 people to document that nothing has changed (4)                                                |
|                               |                                    | Nothing happening but they try             | Nothing is happening, but they do at least engage in conversations (3)                                              |
|                               |                                    | Above their ability to fix                 | It is fixable, but at a much higher level (2)                                                                       |

This code book includes codes organized by interview question with themes included in bold italics. The deidentified participant number is in parentheses.

## Appendix 2

### Glossary of Terms

| Leadership Term      | Definition                                                                                                                                                                                                                                                                                    |
|----------------------|-----------------------------------------------------------------------------------------------------------------------------------------------------------------------------------------------------------------------------------------------------------------------------------------------|
| Relations Behaviors* | A category of behavior that focuses on developing relationships with those being led. This can include behaviors such as supporting and encouraging, recognizing, developing, consulting, and empowering.                                                                                     |
| Task Behaviors*      | A category of behavior that focuses on achieving goals. These behaviors can include short term planning, clarifying task objectives and role expectations, and monitoring performance.                                                                                                        |
| Change Behaviors*    | A category of behavior that focuses on adapting to changes in the environment. Change behaviors can include external monitoring, envisioning change, encouraging innovation, and taking personal risks.                                                                                       |
| Agency**             | The power or ability to produce desired effects through intentionality forethought, self-reactiveness, and self-reflectiveness. Although correlated with self-efficacy, it differs in that self-efficacy relates to the confidence individuals or groups possess in accomplishing objectives. |

\* Yukl, G., Gordon, A., Taber, T., *A Hierarchical Taxonomy of Leadership Behavior: Integrating a Half Century of Behavior Research*. Journal of Leadership & Organizational Studies, 2002. **9**(1): p. 15-32.

\*\*Bandura, A., *Social cognitive theory: an agentic perspective*. Annu Rev Psychol, 2001. **52**: p. 1-26.
